# Supplementary material
Source: PubMed Central journal article supplement (PMC5154458)
Supplement: SD5.pdf [file SD5.pdf]

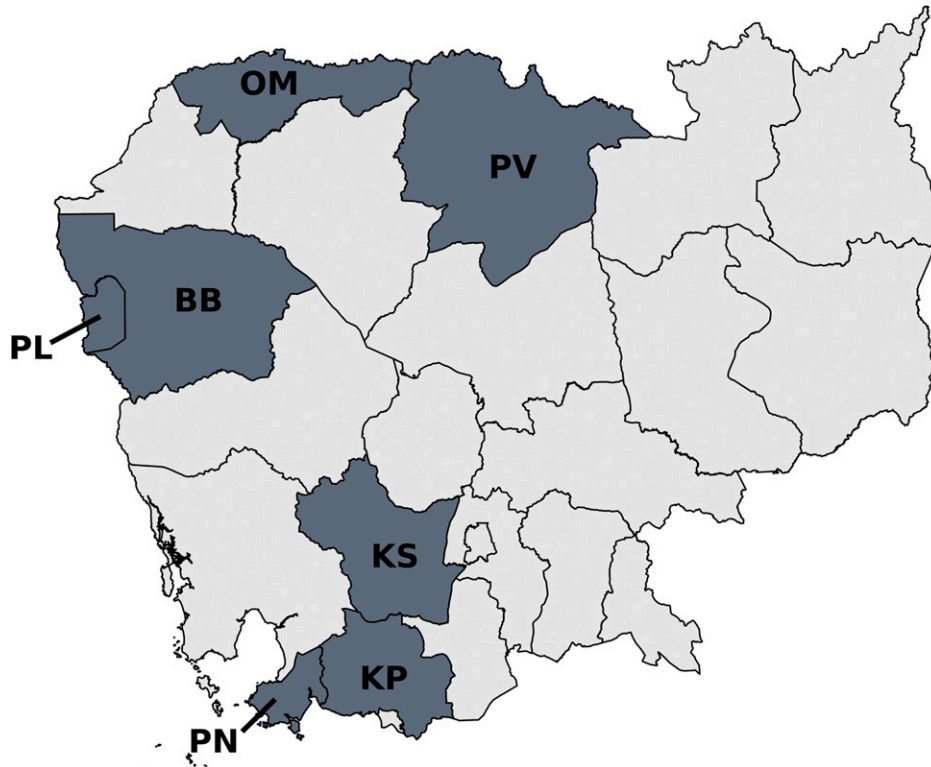

SUPPLEMENTAL FIGURE 1. Map of sampling provinces. BB = Battambang; KP = Kampot; KS = Kampong Speu; OM = Oddor Mean Chey; PL = Pailin; PN = Preah Sihanouk; PV = Preah Vihear.

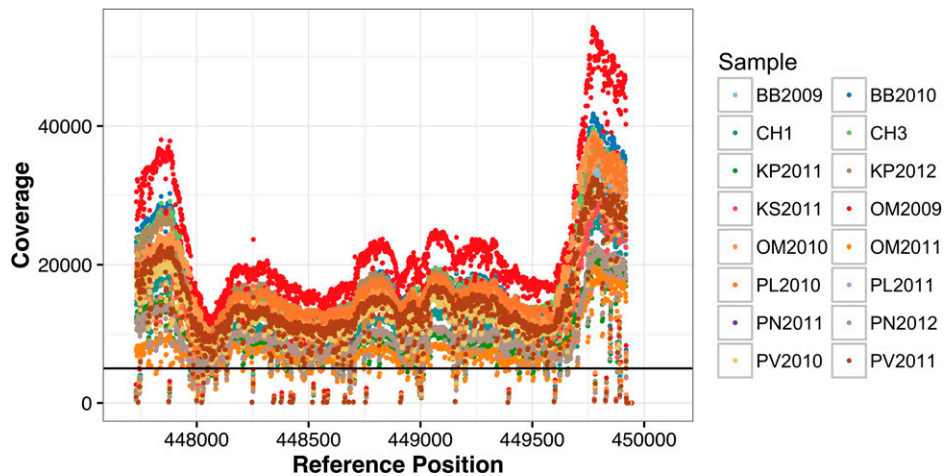

SUPPLEMENTAL FIGURE 2. Distribution of coverage by nucleotide position of bases with high quality ( $q > 20$ ) for each of the pooled samples. The black line represents base coverage below or above 5,000-fold coverage.
